# Supplementary material for: Genome amplification and cellular senescence are hallmarks of human placenta development
Source: PubMed Central journal article supplement (PMC6200260; doi:10.1371/journal.pgen.1007698), 2018-10-12
Supplement: pgen.1007698.s006.pdf [file pgen.1007698.s006.pdf]

**Table S1 Primary and secondary antibodies.**

| <b>Antibody</b>                 | <b>Cat.#</b> | <b>Dilution</b> | <b>Company</b>      | <b>Species</b> | <b>Application</b> |
|---------------------------------|--------------|-----------------|---------------------|----------------|--------------------|
| Aurora B                        | Ab3609       | 1:100           | Abcam               | Mouse          | IF-P               |
| Cathepsin A                     | MAB1049-S    | 1:200           | R&D                 | Mouse          | IF-P               |
| Cyclin A                        | MS-1061-S    | 1:50            | Neomarkers          | Mouse          | IF-P               |
| Cyclin B                        | 610220       | 1:100           | BD Biosciences      | Mouse          | IF-P               |
| Cyclin E                        | sc-247       | 1:100           | Santa Cruz          | Mouse          | IF-P               |
| Cytokeratin7                    | M7018        | 1:200           | DAKO                | Mouse          | IF-P               |
| Cytokeratin<br>(488 conjugated) | A-31556      | 1:100           | Eubio               | Mouse          | IF-P               |
| EGFR                            | 4267         | 1:50            | Cell Signaling      | Rabbit         | IF-P               |
| $\beta$ -galactosidase          | sc-20161     | 1:100           | Santa Cruz          | Rabbit         | IF-P               |
| HLA-G                           | NB500-302    | 1:200           | Novus               | Mouse          | IF-P               |
|                                 |              | 1:500           | Biologicals         |                | WB                 |
| IL-6                            | NCL-L-IL6    | 1:50            | Leica<br>Biosystems | Mouse          | IF-P               |
| Ki67                            | M7240        | 1:100           | DAKO                | Rabbit         | IF-P               |
| p16                             | Sc-56330     | 1:150           | Santa Cruz          | Mouse          | IF-P               |
| p21                             | 2947         | 1:800           | Cell Signaling      | Rabbit         | IF-P               |
| P27                             | 3686         | 1:800           | Cell Signaling      | Rabbit         | IF-P               |
| p57                             | sc-1040      | 1:100           | Santa Cruz          | Rabbit         | IF-P               |
| pH2A.X (Ser139)                 | 9718         | 1:100           | Cell Signaling      | Rabbit         | IF-P               |
| PCNA                            | 2586         | 1:3000          | Cell Signaling      | Mouse          | IF-P               |
| Vimentin                        | Ab16700      | 1:200           | Abcam               | Rabbit         | IF-P               |
| phospho-H3                      | 9701S        | 1:200           | Cell Signaling      | Rabbit         | IF-P               |
| Phospho-Rb                      | 8516         | 1:100           | Cell Signaling      | Rabbit         | IF-P               |
| GAPDH                           | 14C10        | 1:5000          | Cell Signaling      | Rabbit         | WB                 |
| Anti-mouse 488                  | A11017       | 1:1000          | Invitrogen          | Goat           | IF-P               |
| Anti-rabbit 488                 | A11070       | 1:1000          | Invitrogen          | Goat           | IF-P               |
| Anti-mouse 568                  | A11019       | 1:1000          | Invitrogen          | Goat           | IF-P               |
| Anti-rabbit 421                 | 406410       | 1:100           | BioLegend           | Donkey         |                    |
| Anti-rabbit 568                 | A11011       | 1:1000          | Invitrogen          | Goat           | IF-P               |

|                |             |                           |            |       |      |
|----------------|-------------|---------------------------|------------|-------|------|
| HLA-G-PE       | 1P-292-C100 | 5 µg/ml                   | Exbio      | Mouse | MACS |
| EGFR-PE        | sc-101      | 1µg/10 <sup>6</sup> cells | Santa Cruz | Mouse | MACS |
| HLA-G-PE       | 1P-292-C100 | 1:100                     | Exbio      | Mouse | FC   |
| EGFR-488       | sc-101      | 1µg/10 <sup>6</sup> cells | Santa Cruz | Mouse | FC   |
| PE Mouse IgG1  | 550617      | 1:10                      | BD         | Mouse | FC   |
| PE Mouse IgG2b | 555058      | 1:10                      | BD         | Mouse | FC   |

IF-P, Immunofluorescence of paraffin sections; FC, Flow cytometry; MACS, Magnetic-activated cell sorting; WB, Western blot
